# Supplementary material for: RETRACTED: Irreversibility Analysis for Eyring–Powell Nanoliquid Flow Past Magnetized Riga Device with Nonlinear Thermal Radiation
Source: MDPI journal article supplement (doi:10.3390/fluids6110416), 2021-11-16
Supplement: s1 [file s1]

```

(*)                               Filename: Example2.m                               *)
Print["The input file ",$InputFileName," is loaded !"];

(*)  Modify control parameters in BVPh if necessary  (*)

(*)          Define the governing equation          (*)
TypeEQ = 1;
NumEQ = 3;
f[1,z_,{f_,θ_,φ_},Lambda_] := (1+α) ∂{z,3} f - (n1+1) / 2*α*λ* (∂{z,2} f)^2 ∂{z,3} f + f*∂{z,2} f - (2*|
+Fs (∂{z,1} f)^2);
f[2,z_,{f_,θ_,φ_},Lambda_] := 1/Pr (1+δ*θ+Nr (1+(θb-1)θ)^3) ∂{z,2} θ + 3/Pr (Nr (θb-1) (1+ (
+Ec* (∂{z,2} f)^2 ((1+α) - (n1+1) / 6*α*λ* (∂{z,2} f)^2) + 2/ (n1+1) (Da* (∂{z,1} f)^2 + Fs* (∂{z,1} f)^
f[3,z_,{f_,θ_,φ_},Lambda_] := ∂{z,2} φ + Sc (f*∂{z,1} φ - 2/ (n1+1) *γ1*φ) + Nt/Nb ∂{z,2} θ;

```

```

(*)          Define Boundary conditions          (*)
NumBC = 7;
BC[1,z_,{f_, θ_, φ_}] := (f-fw) /. z -> 0;
BC[2,z_,{f_, θ_, φ_}] := (∂{z,1} f-1) /. z -> 0;
BC[3,z_,{f_, θ_, φ_}] := (∂{z,1} θ+B1(1-θ)) /. z -> 0;
BC[4,z_,{f_, θ_, φ_}] := (∂{z,1} φ+B2(1-φ)) /. z -> 0;
BC[5,z_,{f_, θ_, φ_}] := ∂{z,1} f /. z -> infinity;
BC[6,z_,{f_, θ_, φ_}] := θ /. z -> infinity;
BC[7,z_,{f_, θ_, φ_}] := φ /. z -> infinity;
(*) solution interval and integral interval for error *)
zL[1] = 0;
zR[1] = infinity;
zL[2] = 0;
zR[2] = infinity;
zL[3] = 0;
zR[3] = infinity;
zRintegral[1] = 20;
zRintegral[2] = 20;
zRintegral[3] = 20;

```

```

(*)          Define initial guess          (*)
U[1, 0] = 1+fw-E^(-z) ;
U[2, 0] = (B1*E^(-z)) / (1+B1);
U[3, 0] = (B2*E^(-z)) / (1+B2);

```

```

(*)          Defines the auxiliary linear operator          (*)
L[1, u_] := ∂z,z,z u + ∂{z,2} u;
L[2, u_] := ∂z,z u + ∂{z,1} u;
L[3, u_] := ∂z,z u + ∂{z,1} u;

```

```

(*      Define physical and control parameters      *)
 $\lambda=0.1;n1=0.1;H1=0.1;\lambda1=0.1;R=0.1;Da=0.1;Fs=0.1;\delta=0.1;Nt=0.1;Ec=0.1;\gamma1=0.1;\alpha=0.1;B1=0.1;$ 
(*      Print input data      *)
PrintInput[{f[z],  $\theta$ [z],  $\phi$ [z]}];

(*      Get optimal c0      *)
GetOptiVar[4, {}, {c0[1], c0[2], c0[3]}];

(*      Gain 10th-order HAM approximation      *)
BVPh[1, 10];

```
