# Supplementary material for: RETRACTED: Irreversibility Analysis for Eyring–Powell Nanoliquid Flow Past Magnetized Riga Device with Nonlinear Thermal Radiation
Source: MDPI journal article supplement (doi:10.3390/fluids6110416), 2021-11-16
Supplement: s1 [file s1]

```

In[63]:= ClearAll["Global`*"];
(* 3. Set the current working directory to "the current directory" *)
SetDirectory[
  ToFileName[Extract["FileName" /. NotebookInformation[EvaluationNotebook[]],
    {1}, FrontEnd`FileName]]];
(* 4. Read in your input data in current directory and compute *)
<< BVPh2_0.m;
<< Algorithm.m

Package BVPh.m was successfully loaded from C:\Users\Shiteq\Desktop\Fatunbi HAM\BVPh2_0.m !
Last updated by Yin-long Zhao, 00:22, Apr. 26, 2013.
The input file C:\Users\Shiteq\Desktop\Fatunbi HAM\Algorithm.m is loaded !

```

The values of control parameters in BVPh:

```

Ntruncated = 10
NtermMax   = 100
Nintegral  = 200
ErrReq     = 1.×10-28
NgetErr    = 2
ComplexQ   = 0
PRN        = 1
ApproxQ    = 0
TypeL      = TypeL
TypeBase   = TypeBase
HYBRID     = HYBRID
FLOAT      = 1
Naccu      = 100

```

About the system of ODEs:

It has 3 differential equation(s) subject to 7 boundary conditions.

(1) Governing equation(s):

1th ODE:  $0.181818 e^{-2z} + 0.181818 (\theta[z] - 0.1 \phi[z]) - 0.181818 f'[z]^2 - 1.81818 (0.1 f'[z] + 0.1 f'[z]^2) + f[z] f''[z] + 1.1 f^{(3)}[z] - 0.0055 f''[z]^2 f^{(3)}[z] = 0,$

2th ODE:  $f[z] \theta'[z] + 0.2 \theta'[z]^2 + 0.45 (1 + 0.5 \theta[z])^2 \theta'[z]^2 + 0.5 \theta'[z] \phi'[z] + (1 + 0.3 (1 + 0.5 \theta[z])^3 + 0.1 \theta[z]) \theta''[z] = 0,$

3th ODE:  $-0.181818 \phi[z] + f[z] \phi'[z] + 0.2 \theta''[z] + \phi''[z] = 0,$

(2) Boundary conditions:

1th BC:  $-0.1 + f[0] = 0,$

2th BC:  $-1 + f'[0] = 0,$

3th BC:  $0.2 (1 - \theta[0]) + \theta'[0] = 0,$

4th BC:  $0.2 (1 - \phi[0]) + \phi'[0] = 0,$

5th BC:  $f'[\text{infinity}] = 0,$

6th BC:  $\theta[\text{infinity}] = 0,$

7th BC:  $\phi[\text{infinity}] = 0,$

(3) Domain of the ODE:

1th ODE:  $0 \leq z \leq \text{infinity}$

2th ODE:  $0 \leq z \leq \text{infinity}$

3th ODE:  $0 \leq z \leq \text{infinity}$

(4) Integral interval of the error:

1th ODE:  $0 \leq z \leq 20$

2th ODE:  $0 \leq z \leq 20$

3th ODE:  $0 \leq z \leq 20$

Convergence-control parameters in HAM:

(1) Initial guess(es):

$u[1, 0] = 1.1 - e^{-z}$

$u[2, 0] = 0.166667 e^{-z}$

$u[3, 0] = 0.166667 e^{-z}$

(2) Auxiliary linear operator(s):

$L[1, u] = u''[z] + u^{(3)}[z]$

$L[2, u] = u'[z] + u''[z]$

$L[3, u] = u'[z] + u''[z]$

(3) Auxiliary function(s):

$H[1, z] = 1$

$H[2, z] = 1$

$H[3, z] = 1$

(4) Convergence-control parameter(s):

$c0[1] = c0[1]$

$c0[2] = c0[2]$

$c0[3] = c0[3]$

Computing optimal values...

ApproxQ = 0

TypeL = TypeL

k = 1

k = 2

k = 3

The minimum error at 3th order:

$\{2.28882 \times 10^{-6}, \{c0[1.] \rightarrow -0.734404, c0[2.] \rightarrow -0.811981, c0[3.] \rightarrow -0.597605\}\}$

Used CPU time = 45.8736 (seconds)

Computing higher order approximations...

ApproxQ = 0

TypeL = TypeL

k = 1

Used CPU time = 0.374986 (seconds)

k = 2

Err[2] =  $\{1.693 \times 10^{-6}, 9.40822 \times 10^{-6}, 1.7621 \times 10^{-7}\}$

Used CPU time = 1.49995 (seconds)

k = 3

Used CPU time = 2.64054 (seconds)

k = 4

Err[4] =  $\{2.01627 \times 10^{-9}, 2.46976 \times 10^{-7}, 1.2174 \times 10^{-7}\}$

Used CPU time = 5.84357 (seconds)

k = 5

Used CPU time = 9.17159 (seconds)

k = 6

Err[6] =  $\{2.67526 \times 10^{-9}, 1.01354 \times 10^{-8}, 6.86611 \times 10^{-9}\}$

Used CPU time = 17.2182 (seconds)

k = 7

Used CPU time = 24.7492 (seconds)

k = 8

Err[8] =  $\{1.23103 \times 10^{-10}, 5.00472 \times 10^{-10}, 4.28312 \times 10^{-11}\}$

Used CPU time = 39.7644 (seconds)

k = 9

Used CPU time = 55.3733 (seconds)

k = 10

Err[10] =  $\{1.66129 \times 10^{-13}, 2.50935 \times 10^{-11}, 2.50939 \times 10^{-12}\}$

Used CPU time = 84.61 (seconds)

Successful !

In[67]:=

In[68]:=
